# Supplementary material for: Thermodynamic investigation of the interaction between ionic liquid functionalized gold nanoparticles and human serum albumin for selective determination of glutamine
Source: Royal Society of Chemistry journal article supplement (doi:10.1039/d0ra04394j), 2020-01-01
Supplement: d0ra04394j1.pdf [file d0ra04394j1.pdf]

# Thermodynamic Investigation of the Interaction between Ionic Liquid Functionalized Gold Nanoparticles and Human Serum Albumin for Selective Determination of Glutamine

Sushama Sahu,<sup>a</sup> Reshma,<sup>a</sup> Srishti Sharma,<sup>a</sup> Indrapal Karbhal<sup>a</sup> and Kallol K. Ghosh<sup>\*a</sup>

<sup>a</sup>School of Studies in Chemistry, Pt. Ravishankar Shukla University, Raipur-492010 (C.G.),  
India

## SUPPLEMENTARY MATERIALS

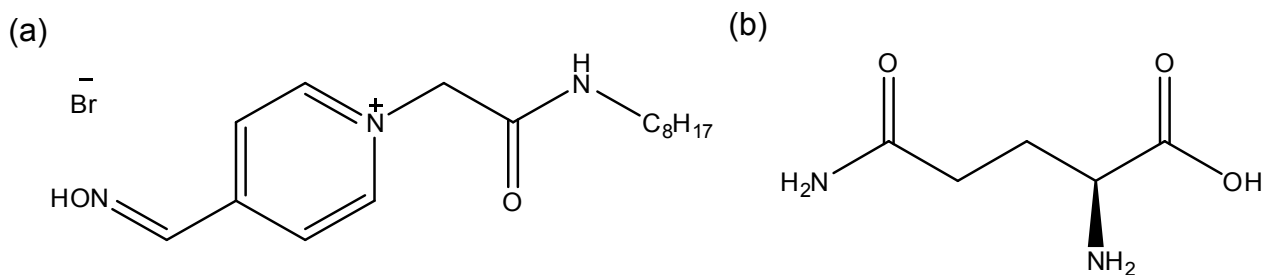

**Fig. S1** Chemical structure of (a) amino based ionic liquid [4-((hydroxiimino)methyl)-1-(2-(octylamino)-2-oxoethyl)pyridine-1-iumbromide] and (b) glutamine.

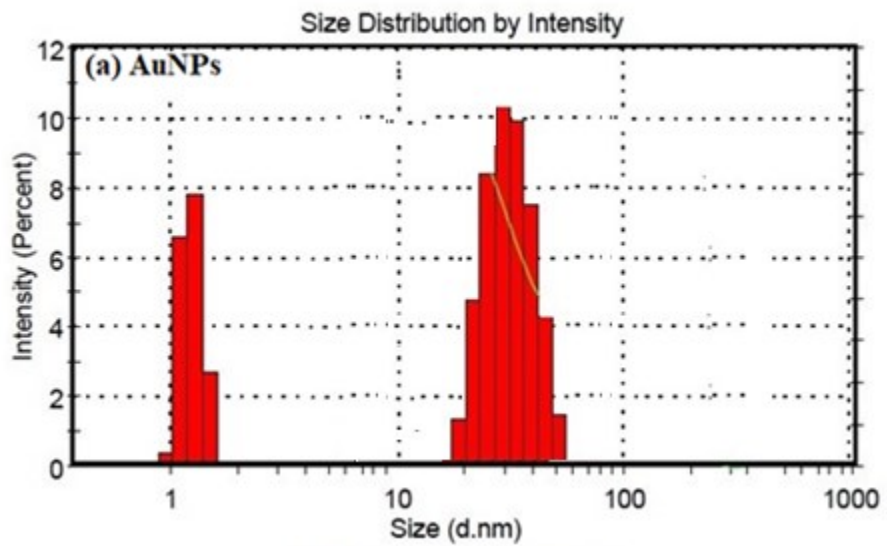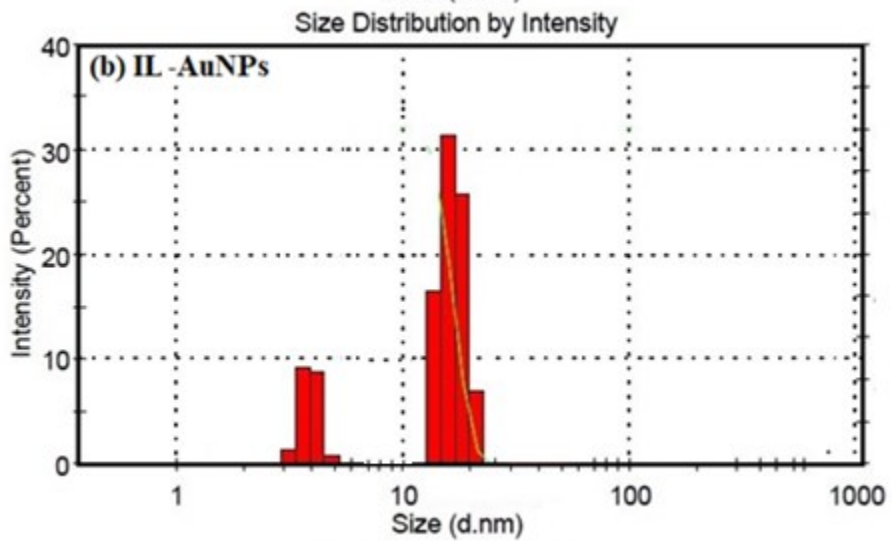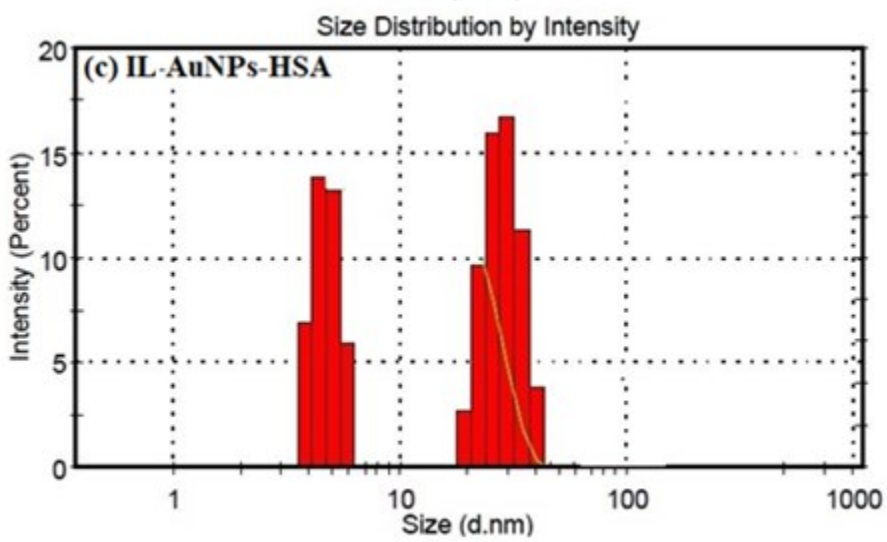

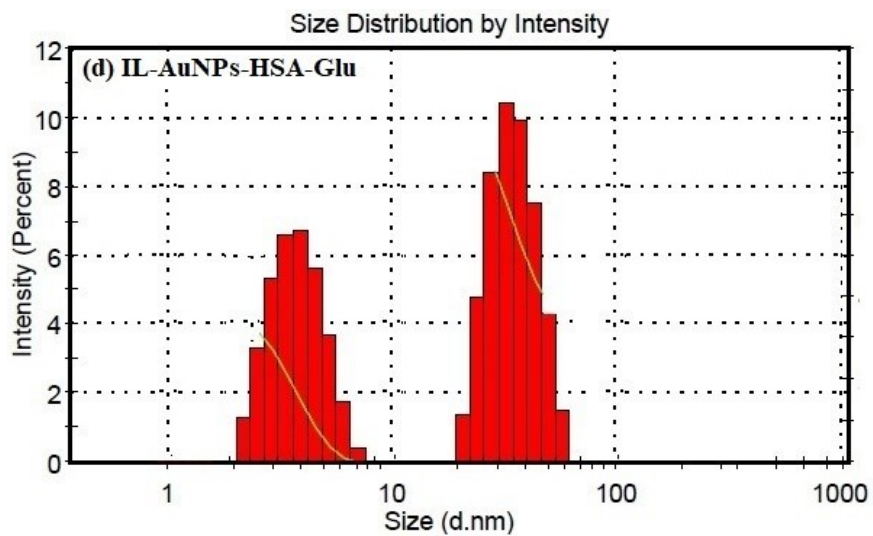

**Fig. S2** DLS size distribution plots of (a) AuNPs, (b) IL-AuNPs (c) IL-AuNPs-HSA and (d) IL-AuNPs-HSA with Glu.

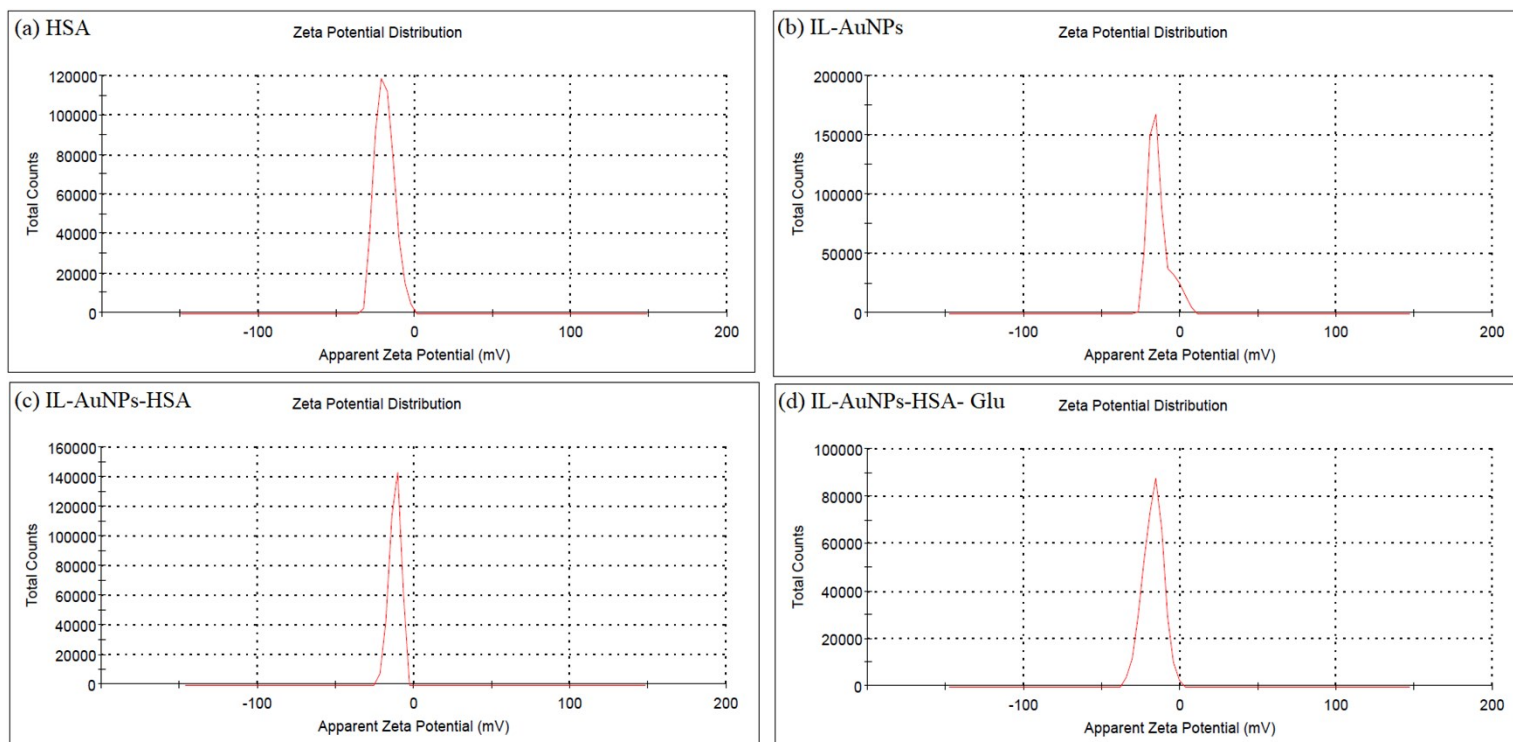

**Fig. S3** Zeta potential measurements of (a) HSA, (b) IL-AuNPs (c) IL-AuNPs-HSA and (d) IL-AuNPs-HSA with Glu.

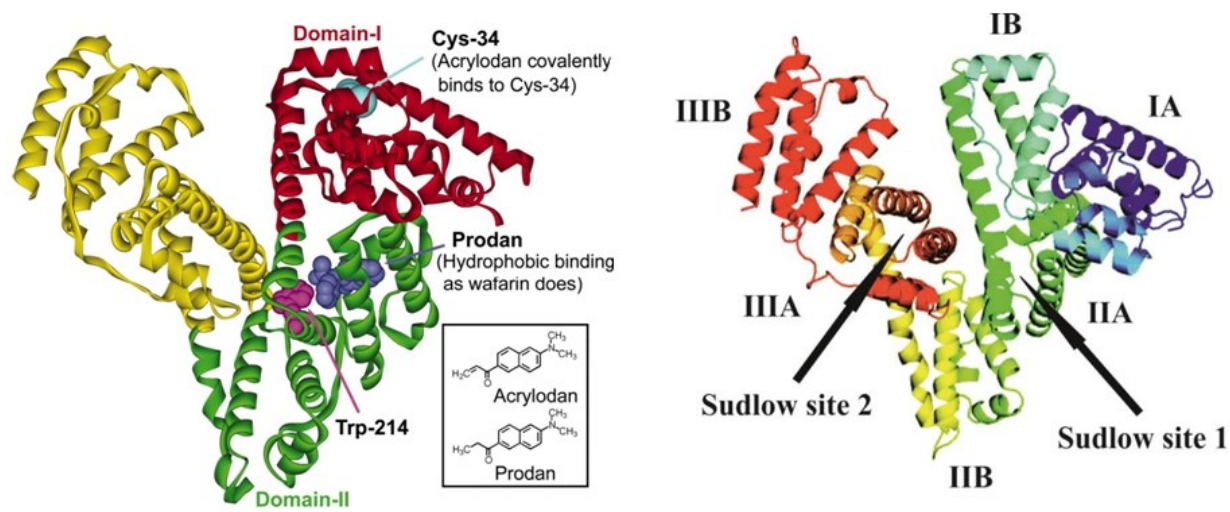

**Fig. S4** Structure of HSA showing three different domains.

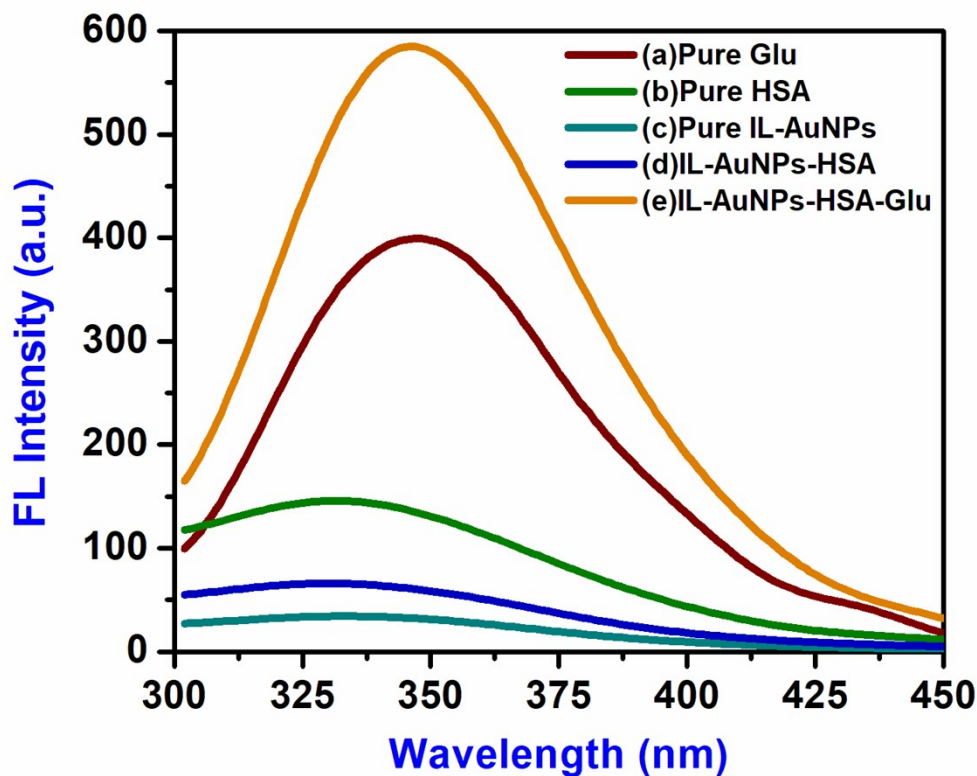

**Fig. S5** Fluorescence spectra for (a) pure Glu, (b) pure HSA, (c) pure IL-AuNPs, (d) IL-AuNPs-HSA and (e) IL-AuNPs-HSA with Glu.

**Table S1.** Comparison of sensitivities of detection techniques with the proposed methodology

| Method                    | Analyte            | Concentration       | Correlation Coefficient | Limit of Detection | Ref |
|---------------------------|--------------------|---------------------|-------------------------|--------------------|-----|
| Colorimetry               | Lysozyme           | 100-1000 nM         | 0.9890                  | 50 nM              | 52  |
| Colorimetry               | Lysozyme           | 20 nM to 2 $\mu$ M  | 0.99                    | 20 nM              | 53  |
| Impedimetric              | MWCNT-SPEs-aptamer | 0-28.6 $\mu$ M      | 0.9984                  | 862 nM             | 54  |
| Capillary Electrophoresis | Lysozyme           | 0.005-0.3 $\mu$ M   | 0.9930                  | 8 nM               | 55  |
| Fluorescence              | FITC-BSA           | 0.0-0.10 $\mu$ g/ml | 0.94                    |                    | 56  |

|             |           |           |         |      |                   |
|-------------|-----------|-----------|---------|------|-------------------|
| Colorimetry | Glutamine | 10-100 nM | 0.99627 | 0.67 | Present<br>Method |
|-------------|-----------|-----------|---------|------|-------------------|

---
